# Supplementary material for: Sex-Related Differences in Innate and Adaptive Immune Responses to SARS-CoV-2
Source: PubMed Central journal article supplement (PMC8563790; doi:10.3389/fimmu.2021.739757), 2021-10-20
Supplement: DataSheet_1.pdf [file DataSheet_1.pdf]

Supplementary figure 1

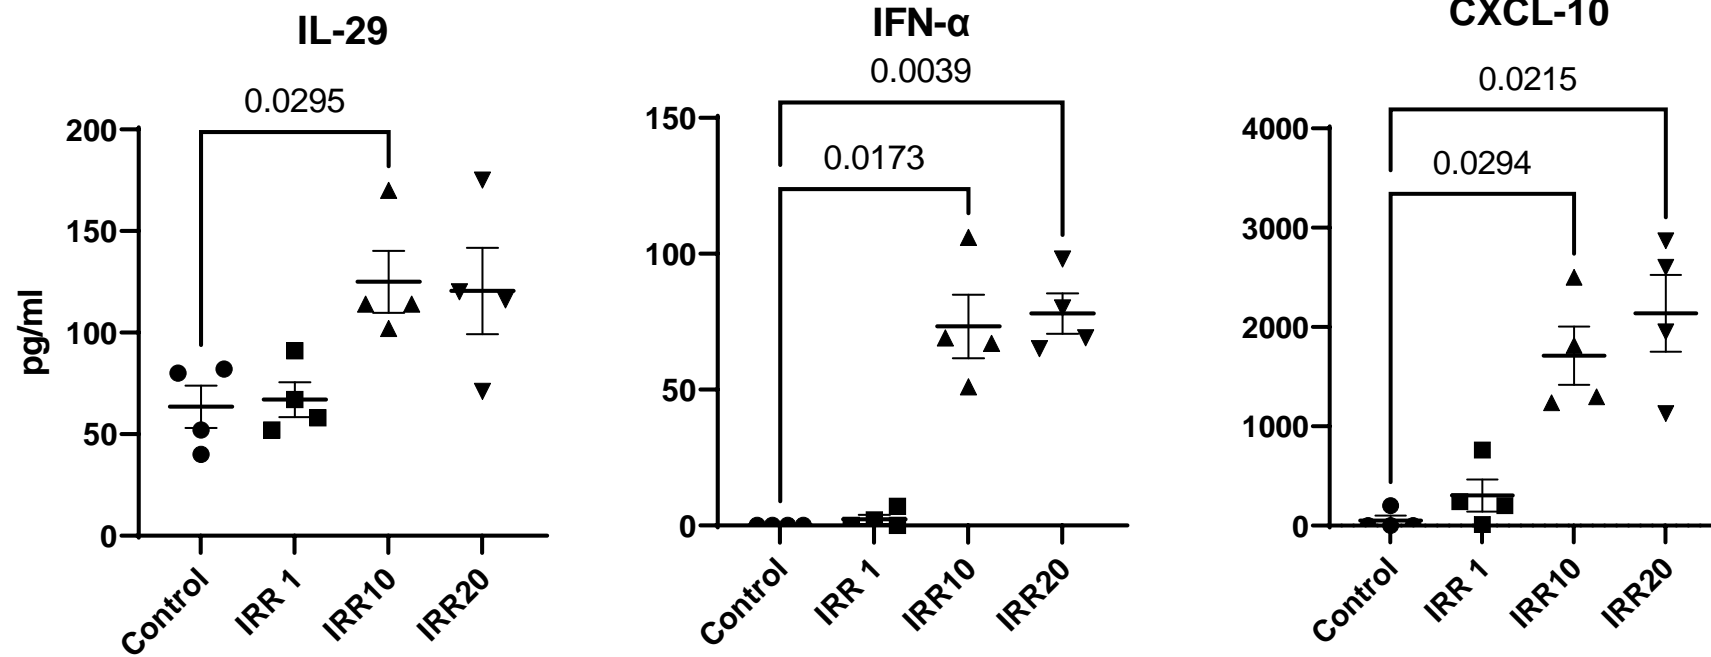

PBMCs were stimulated o/n with irradiated SARS-CoV-2 at concentrations ranging from 1 $\mu$ g/ml-20 $\mu$ g/ml. Graphs depict the quantitation of cytokines/chemokines in the supernatant by specific ELISAs (IL-29 and IFN- $\alpha$  from Biolegend and CXCL-10 from BD Biosciences). Mean  $\pm$  S.E. N=4 subjects. P value was calculated using one way ANOVA.

## Supplementary figure 2

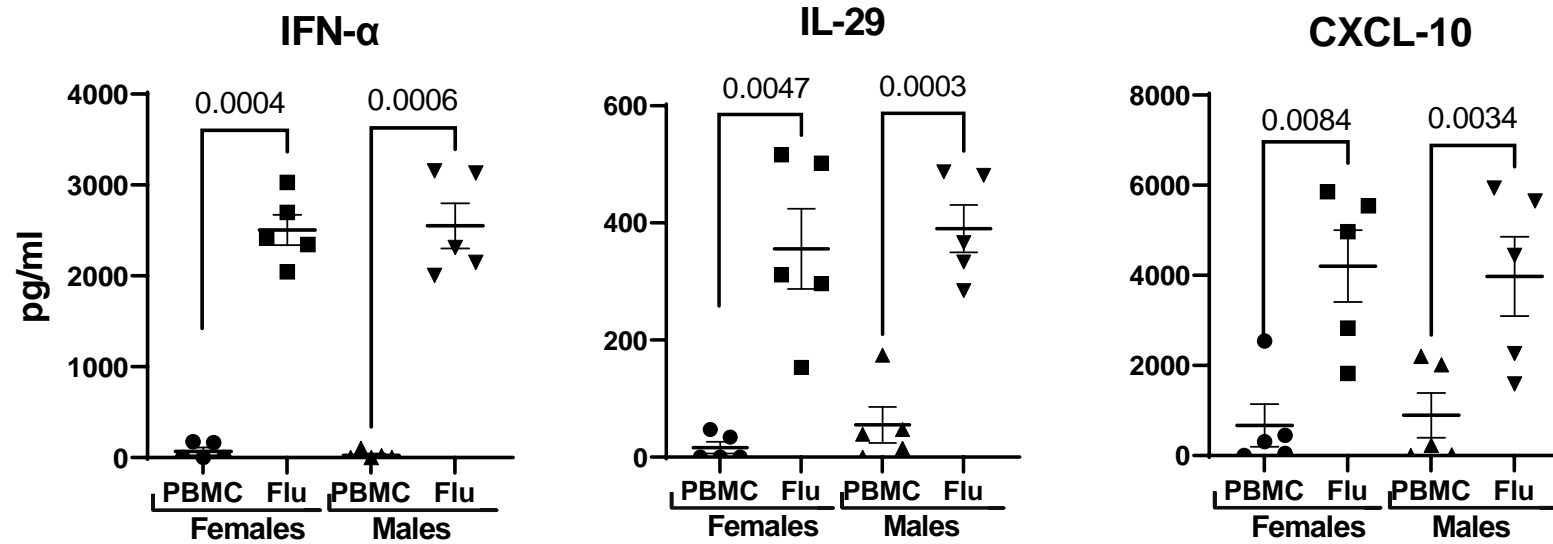

PBMCs were stimulated o/n with inactivated influenza virus A at 1 $\mu$ g/ml. Graphs depict the quantitation of cytokines/chemokines in the supernatant by multiplex. Mean  $\pm$  S.E. N=5 subjects. P value was calculated using paired t test.

**IFN-α 24h(pg/ml)**

| Female |       | Male |      |
|--------|-------|------|------|
| PBMC   | IRR   | PBMC | IRR  |
| 11.1   | 14.3  | 0    | 3.5  |
| 0      | 0.8   | 0    | 0    |
| 0      | 17.3  | 0    | 0    |
| 0      | 290.9 | 0    | 17.3 |
| 0      | 36    | 21   | 404  |
| 165    | 277   | 103  | 186  |
| 176    | 480   | 0.4  | 0.5  |
| 0      | 74    | 0    | 0    |
| 0      | 10    | 0    | 4    |
| 0      | 52    | 0    | 0    |
| 0      | 17    | 0    | 0    |
| 0      | 2     | 0    | 0    |
| 0      | 84    | 0    | 2    |
| 0      | 1     | 0    | 4    |
| 1      | 2     | 0    | 5    |

**IL-29 24h(pg/ml)**

| Female |     | Male |     |
|--------|-----|------|-----|
| PBMC   | IRR | PBMC | IRR |
| 213    | 345 | 39   | 115 |
| 42     | 105 | 30   | 60  |
| 26     | 59  | 39   | 54  |
| 36     | 66  | 61   | 485 |
| 38     | 514 | 15   | 0   |
| 0      | 47  | 0    | 23  |
| 78     | 578 | 174  | 177 |
| 38     | 96  | 47   | 42  |
| 84     | 823 | 28   | 65  |
| 23     | 132 | 22   | 32  |
| 40     | 93  | 50   | 36  |
| 16     | 288 | 24   | 54  |
| 30     | 62  | 31   | 150 |
| 32     | 72  | 38   | 103 |
| 55     | 80  | 24   | 73  |

**CXCL-10 24h(pg/ml)**

| Female |      | Male |      |
|--------|------|------|------|
| PBMC   | IRR  | PBMC | IRR  |
| 153    | 467  | 232  | 1426 |
| 63     | 367  | 118  | 1240 |
| 595    | 1173 | 940  | 1079 |
| 0      | 1011 | 0    | 1594 |
| 958    | 26   | 220  | 420  |
| 0      | 1161 | 0    | 16   |
| 545    | 512  | 2015 | 2053 |
| 0      | 1332 | 219  | 770  |
| 106    | 205  | 115  | 419  |
| 179    | 395  | 276  | 458  |
| 166    | 119  | 304  | 507  |
| 288    | 234  | 341  | 485  |
| 230    | 234  | 66   | 357  |
| 221    | 322  | 105  | 443  |
| 328    | 238  | 279  | 330  |

*PBMC represents the unstimulated condition and IRR the PBMCs stimulated condition with irradiated SARS-CoV2  
Values for unstimulated and stimulated are paired and from the same donor*

**HLADR (pDC) MFI**

| Female |       | Male  |        |
|--------|-------|-------|--------|
| pDC    | IRR   | pDC   | IRR    |
| 34300  | 42053 | 36957 | 65445  |
| 4621   | 6942  | 1812  | 1468   |
| 521    | 688   | 13873 | 11995  |
| 17657  | 32144 | 22087 | 18052  |
| 8491   | 12922 | 15639 | 12601  |
| 5389   | 6103  | 7563  | 11668  |
| 13043  | 15023 | 22032 | 28154  |
| 20968  | 27231 | 13251 | 18184  |
| 18779  | 23639 | 25836 | 32552  |
| 15487  | 20579 | 24877 | 25326  |
| 27512  | 37959 | 20733 | 22527  |
| 29376  | 33915 | 17267 | 16852  |
| 14500  | 19350 | 14569 | 12722  |
| 55608  | 65678 | 86347 | 103562 |
| 43666  | 52028 | 69265 | 76963  |

**HLADR (mDC) MFI**

| Female |        | Male  |       |
|--------|--------|-------|-------|
| mDC    | IRR    | mDC   | IRR   |
| 26235  | 28567  | 19466 | 22061 |
| 18843  | 22927  | 10083 | 11268 |
| 6767   | 11265  | 9827  | 10168 |
| 25236  | 40047  | 10134 | 9656  |
| 18867  | 44982  | 11767 | 11282 |
| 12241  | 19579  | 20887 | 15405 |
| 53143  | 60007  | 37428 | 44099 |
| 38681  | 61144  | 56928 | 76658 |
| 78794  | 118285 | 31644 | 32173 |
| 54174  | 63059  | 35542 | 95957 |
| 54130  | 65894  | 40409 | 48852 |
| 50493  | 88910  | 72585 | 83574 |
| 18835  | 24995  | 18075 | 26607 |
| 19262  | 23928  | 19859 | 24752 |
| 18743  | 25181  | 57720 | 61628 |

**HLADR (monocytes) MFI**

| Female |       | Male  |       |
|--------|-------|-------|-------|
| CD14   | IRR   | CD14  | IRR   |
| 19395  | 26572 | 7390  | 22348 |
| 4358   | 12449 | 6140  | 13419 |
| 6756   | 16282 | 8259  | 10176 |
| 9647   | 11967 | 42700 | 36825 |
| 11968  | 21135 | 33934 | 33690 |
| 17814  | 22760 | 37240 | 42686 |
| 11034  | 24883 | 19885 | 21479 |
| 22816  | 34349 | 14700 | 14445 |
| 7516   | 12916 | 9295  | 19448 |
| 14384  | 24353 | 10950 | 10574 |
| 11597  | 13961 | 15037 | 18135 |
| 10259  | 10011 | 10239 | 10140 |
| 9822   | 16104 | 9415  | 13962 |
| 8966   | 13794 | 9688  | 10578 |
| 8418   | 12928 | 11256 | 13620 |

**CD86 (pDC) MFI**

| Female |      | Male |      |
|--------|------|------|------|
| pDC    | IRR  | pDC  | IRR  |
| 700    | 1090 | 1109 | 1056 |
| 1111   | 1518 | 247  | 310  |
| 237    | 379  | 1203 | 1365 |
| 652    | 835  | 2739 | 2694 |
| 426    | 597  | 2774 | 3410 |
| 6495   | 7753 | 5878 | 9469 |
| 6126   | 7877 | 1689 | 1404 |
| 737    | 1005 | 533  | 727  |
| 495    | 689  | 674  | 757  |
| 502    | 1027 | 841  | 961  |
| 975    | 1138 | 759  | 721  |
| 559    | 644  | 644  | 545  |
| 6331   | 9430 | 1329 | 658  |
| 4988   | 8046 | 6436 | 9449 |
| 3582   | 5271 | 6627 | 5950 |

**CD86 (mDC) MFI**

| Female |       | Male |       |
|--------|-------|------|-------|
| mDC    | IRR   | mDC  | IRR   |
| 3224   | 3427  | 2554 | 2962  |
| 5097   | 7706  | 2280 | 2624  |
| 2039   | 2400  | 9827 | 10168 |
| 2406   | 4014  | 2181 | 2141  |
| 2416   | 2974  | 2224 | 2369  |
| 2308   | 3703  | 3371 | 2703  |
| 1854   | 2192  | 4297 | 4311  |
| 5091   | 16075 | 6279 | 7204  |
| 7292   | 9149  | 3085 | 3129  |
| 2947   | 5391  | 6942 | 7152  |
| 3916   | 5570  | 8787 | 11232 |
| 10011  | 21217 | 5316 | 5757  |
| 5156   | 6181  | 3844 | 3634  |
| 5523   | 8668  | 6168 | 6960  |
| 6284   | 14068 | 5796 | 13139 |

**CD86 (monocytes) MFI**

| Female |       | Male  |       |
|--------|-------|-------|-------|
| CD14   | IRR   | CD14  | IRR   |
| 3626   | 5437  | 853   | 2045  |
| 890    | 4201  | 998   | 5099  |
| 1949   | 3567  | 8259  | 10176 |
| 1946   | 3451  | 42700 | 36825 |
| 17814  | 22760 | 33934 | 33690 |
| 11034  | 24883 | 37240 | 42686 |
| 3322   | 6603  | 3158  | 3730  |
| 2508   | 3546  | 4342  | 4830  |
| 4445   | 6549  | 2221  | 2139  |
| 6676   | 14625 | 4345  | 6168  |
| 2691   | 3692  | 3542  | 3802  |
| 3111   | 7489  | 4713  | 5818  |
| 3608   | 5379  | 3495  | 4984  |
| 3480   | 5147  | 3920  | 6667  |
| 5472   | 7351  | 4699  | 6712  |

2261.0667 3153.26667 2232.133 2631.73333

4370.933 7515.666667 4863.4 5699 #DIV/0!  
1.719465

4838.133 8312 10561.267 11691.4  
1.718018

*pDC, mDC and CD14 represents the unstimulated condition and IRR the stimulated with irradiated SARS-CoV2  
Values for unstimulated and stimulated are paired and from the same donor*

**GranzymeB Perforin + CTLs (% cells)**

| Female |      | Male |      |
|--------|------|------|------|
| CD8T   | IRR  | CD8T | IRR  |
| 0.1    | 0.49 | 18.7 | 24.7 |
| 5.26   | 7.51 | 2.64 | 2.62 |
| 9.75   | 15.9 | 40.1 | 35.1 |
| 23.2   | 30.8 | 45.1 | 98.7 |
| 8.88   | 10   | 71.6 | 69.4 |
| 2.64   | 2.62 | 60.7 | 61.1 |
| 0.44   | 0.72 | 16.9 | 16.9 |
| 0.15   | 1.57 | 9.95 | 13   |
| 47.1   | 50.4 | 39.3 | 44.3 |
| 8      | 14   | 3.2  | 3.18 |
| 4.21   | 36.1 | 2.49 | 7.05 |
| 41.8   | 47.4 | 18.1 | 9.95 |
| 11.7   | 18.9 | 2.77 | 3.54 |
| 25.1   | 48.3 | 62.1 | 56.5 |
| 3.28   | 2.56 | 3.21 | 2.66 |
| 2.4    | 26.4 | 18.9 | 21.7 |
| 4.77   | 4.92 | 17.9 | 3.82 |

**Granzyme B Day 7 (pg/ml)**

| Female |      | Male |      |
|--------|------|------|------|
| PBMC   | IRR  | PBMC | IRR  |
| 0      | 408  | 0    | 0    |
| 541    | 1437 | 0    | 761  |
| 914    | 1732 | 0    | 0    |
| 46     | 890  | 0    | 1077 |
| 0      | 1242 | 0    | 541  |
| 1362   | 2123 | 104  | 207  |
| 349    | 491  | 140  | 384  |
| 83     | 388  | 292  | 391  |
| 48     | 304  | 330  | 347  |
| 263    | 861  | 298  | 301  |
| 387    | 851  | 629  | 711  |
| 96     | 320  | 640  | 548  |
| 213    | 429  | 692  | 801  |
| 715    | 809  | 601  | 696  |
| 123    | 637  | 333  | 500  |
| 274    | 640  | 477  | 606  |
| 328    | 450  | 592  | 521  |

**IFN-α Day7(pg/ml)**

| Female |     | Male |      |
|--------|-----|------|------|
| PBMC   | IRR | PBMC | IRR  |
| 0      | 179 | 0    | 1665 |
| 0      | 0   | 0    | 1888 |
| 0      | 0   | 0    | 162  |
| 0      | 158 | 0    | 768  |
| 0      | 0   | 0    | 510  |
| 0      | 0   | 0    | 129  |
| 0      | 0   | 0    | 62   |
| 0      | 0   | 0    | 223  |
| 0      | 0   | 0    | 84   |
| 0      | 0   | 1    | 28   |
| 0      | 30  | 1    | 23   |
| 1      | 261 | 1    | 25   |
| 1      | 11  | 1    | 35   |
| 1      | 10  | 1    | 368  |
| 1      | 58  | 1    | 212  |
| 1      | 4   | 1    | 53   |
| 1      | 117 | 1    | 129  |

**PBMC represents the unstimulated condition and IRR the PBMCs stimulated with irradiated SARS-CoV2  
 Values for unstimulated and stimulated are paired and from the same donor**
